# Supplementary material
Source: Research Square preprint supplement (doi:10.21203/rs.3.rs-9444014/v1)
Supplement: Supplementary file 1 [file aabc5b3a9907ef90505a86bc.docx]

Table 2. Taxonomic composition and diversity indices of different insect community groups

| Signs | Order | Family | Genus | Richness | Abundance | Shannon  Diversity Index | Simpson  Dominance  Index |
| --- | --- | --- | --- | --- | --- | --- | --- |
| 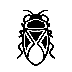 | Hemiptera | 4 | 61 | 92 | 3462 | 3.9661 | 0.0250 |
| 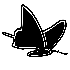 | Lepidoptera | 6 | 83 | 151 | 4515 | 4.2947 | 0.0182 |
| 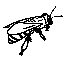 | Hymenoptera | 9 | 40 | 76 | 1911 | 4.0133 | 0.0228 |
| 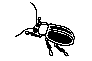 | Coleoptera | 16 | 142 | 192 | 1522 | 3.988 | 0.0241 |
| 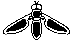 | Diptera | 12 | 63 | 90 | 1038 | 3.7331 | 0.0371 |
| 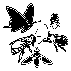 | Total | 47 | 389 | 601 | 12448 | 4.5458 | 0.0321 |
